# Supplementary material for: Inhibition of histone H3K27 demethylases selectively modulates inflammatory phenotypes of natural killer cells
Source: PubMed Central journal article supplement (PMC5818173; doi:10.1074/jbc.ra117.000698), 2018-01-04
Supplement: supp_RA117.000698_133519_1_supp_42996_p1bs8z.pdf [file supp_RA117.000698_133519_1_supp_42996_p1bs8z.pdf]

**SUPPLEMENTARY MATERIAL****Selective modulation of inflammatory Natural Killer (NK) cell phenotypes following histone H3K27 demethylase inhibition**

Adam Cribbs, Edward S Hookway, Graham Wells, Morten Lindow, Susanna Obad, Henrik Oerum, Rab Prinjha, Nick Athanasou, Aneka Sowman, Martin Philpott, Henry Penn, Kalle Soderstrom, Marc Feldmann, Udo Oppermann

**TABLE OF CONTENTS****SUPPLEMENTARY FIGURES**

**Supplementary Figure 1:** Results of epigenetic compound screen for IFN- $\gamma$  production in the Nishi NK cell line.

**Supplementary Figure 2:** IC50 determination for IFN $\gamma$  release in human NK cells treated with BET bromodomain or HDAC inhibitors.

**SUPPLEMENTARY FIGURE 3:** FACS analysis for NK receptors under GSK-J4 treatment

**SUPPLEMENTARY TABLES**

**Supplementary Table 1:** List and details of epigenetic tool compounds used in the initial IFN- $\gamma$  screen.

**Supplementary Table 2:** Clinical details of RA patients

**Supplementary Table 3:** Sequences of RT-PCR primer pairs for genes used in this study

**SUPPLEMENTARY FIGURES**

**SUPPLEMENTARY FIGURE 1: Results of epigenetic compound screen for IFN- $\gamma$  production in the Nishi NK cell line.**

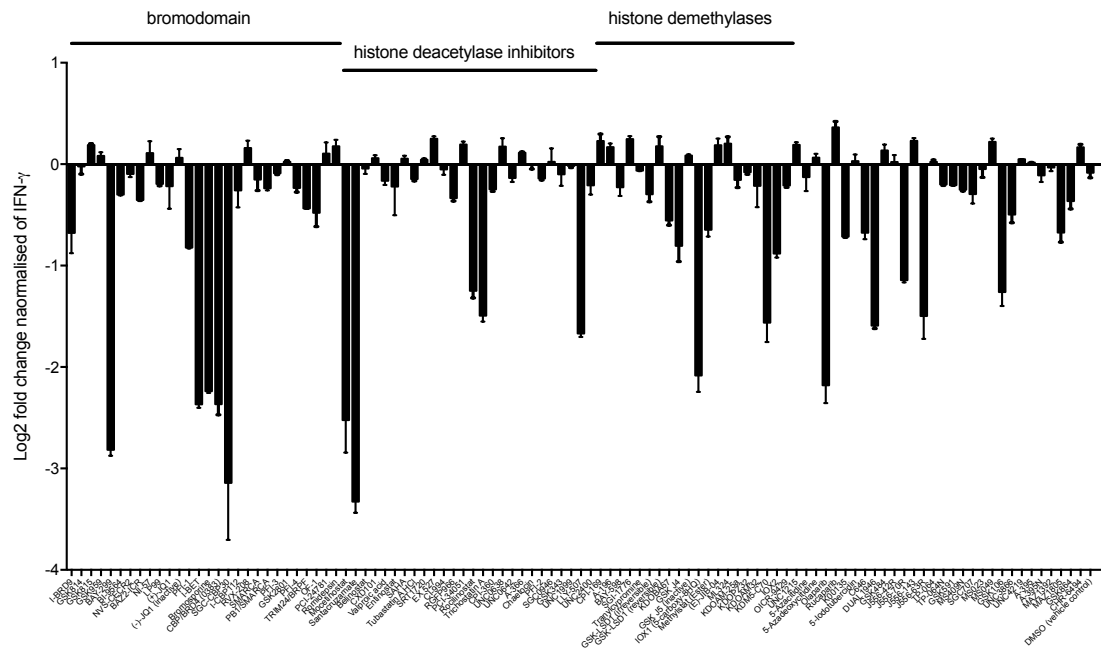

Nishi cells were stimulated with IL-15 then cultured for 24 hours in the presence of DMSO or small molecule epigenetic inhibitors and supernatant was harvested. Levels of IFN-γ were measured by ELISA and log2 fold changes were determined against DMSO.

**SUPPLEMENTARY FIGURE 2: IC50 determination for IFN $\gamma$  release in human NK cells treated with BET bromodomain or HDAC inhibitors.**

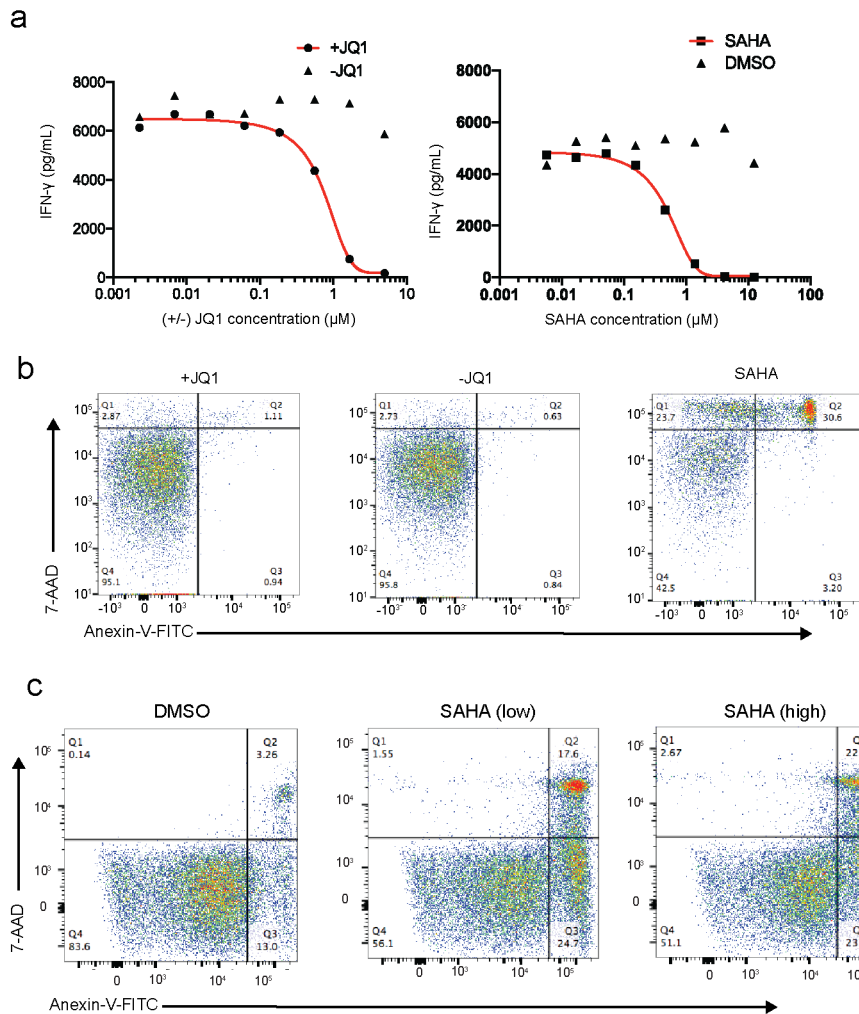

NK cells were isolated from peripheral blood, stimulated with IL-15 then cultured for 48 hours in the presence of DMSO or small molecule epigenetic inhibitors and supernatant was harvested. (A) The IC<sub>50</sub> of +JQ1 and SAHA was determined for each inhibitor with IL-12 and IL-15 stimulated NK cells following 48 hours of culture. (B) NK cells were isolated from peripheral blood, stimulated with IL-15 and cultured in the presence of DMSO, +JQ1 and -JQ1 for 48 hours. Cells were stained with Anxin-V-FITC and 7-AAD then analysed using flow cytometry. In each panel the lower left quadrant shows cells, which are negative for both 7-AAD and Anxin-V, upper left quadrant shows only 7-AAD positive cells, which are necrotic. The lower right quadrant shows cells that are positive for Anxin-V (early apoptotic) and the upper right shows Anxin-V and 7-AAD positive cells (late apoptotic). (C) NK cells were cultured in 0.25  $\mu$ M (Low) and 2.5  $\mu$ M (High) concentrations of SAHA for 48 hours then stained with Anxin-V-FITC and 7-AAD then analysed using flow cytometry.

**SUPPLEMENTARY FIGURE 3: FACS analysis for NK receptors under GSK-J4 treatment**

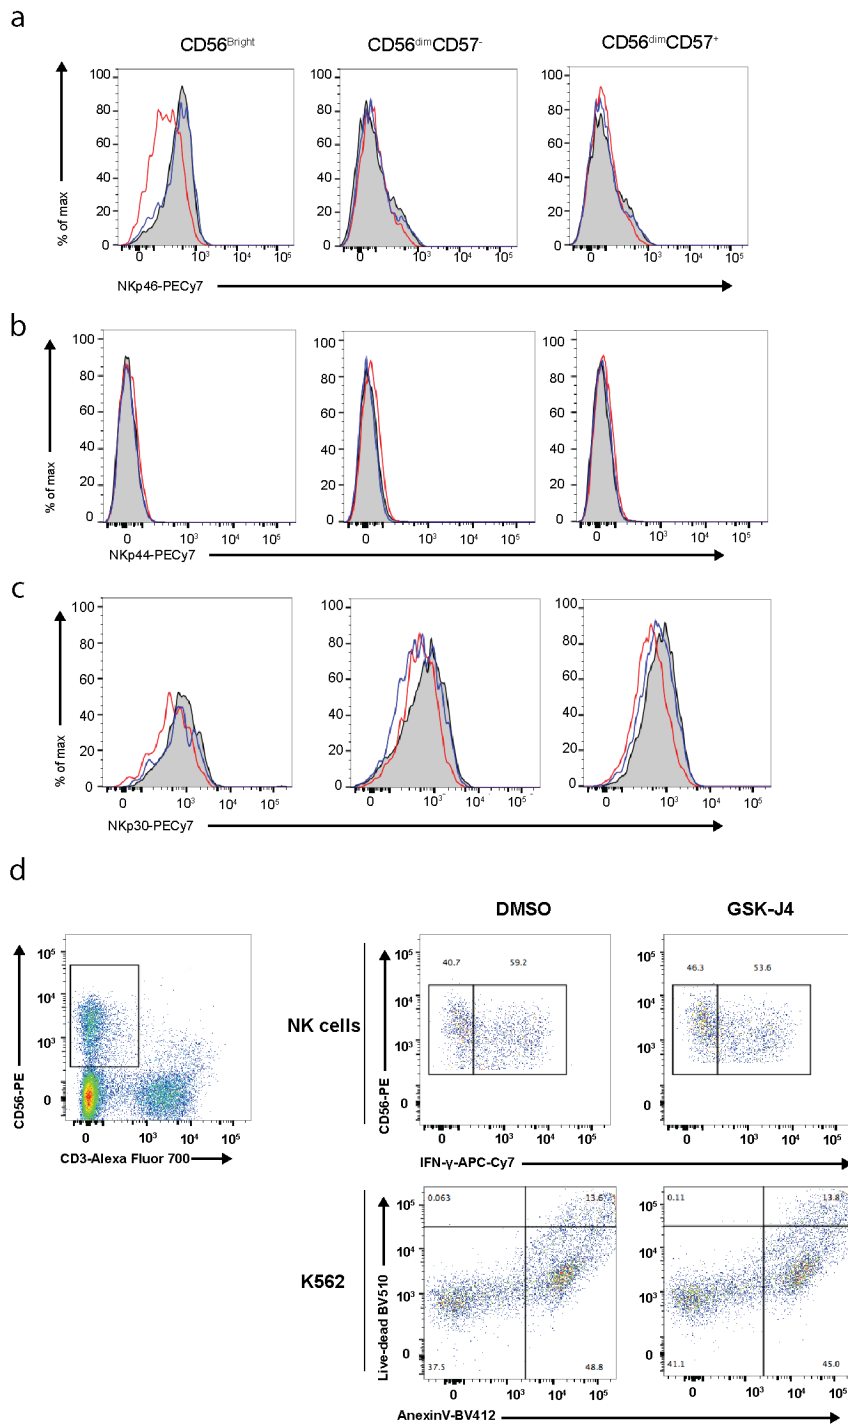

(a, b, c) Flow cytometry analysis of activating NK cell receptors (NCR1, NCR2, NCR3) in different NK cell populations after GSK-J4 treatment. Data shows representative histogram of four independent experiments. (d) Gating strategy and flow cytometry of NK cell killing assays using K562 cell lines. Data is representative of three independent donors.

## SUPPLEMENTARY TABLES

**Supplementary Table 1:** List and details of epigenetic tool compounds used in the initial IFN- $\gamma$  screen. Major target classes are highlighted by colour coding.

| CLASS                      | TARGET                 | COMPOUND NAME | SCREENING CONCENTRATION [ $\mu$ M] | SUPPLIER                     | PubMed ID | COMMENTS                         |
|----------------------------|------------------------|---------------|------------------------------------|------------------------------|-----------|----------------------------------|
| Arginine methyltransferase | PRMT3                  | SGC707        | 1                                  | Sigma                        | 25728001  |                                  |
| Arginine methyltransferase | PRMT4                  | TP-064        | 1                                  | SGC                          |           |                                  |
| Arginine methyltransferase | PRMT4                  | TP-064N       | 1                                  | SGC                          |           | inactive control for TP-064      |
| Arginine methyltransferase | PRMT4, PRMT6           | MS049         | 1                                  | Sigma                        | 27584694  |                                  |
| Arginine methyltransferase | PRMT4, PRMT6           | MS409N        | 1                                  | Sigma                        | 27584694  | inactive control for MS409       |
| Arginine methyltransferase | PRMT5                  | GSK591        | 1                                  | Sigma                        | 26985292  |                                  |
| Arginine methyltransferase | PRMT5                  | J556-143      | 1                                  | Changchun Discovery Sciences |           |                                  |
| Arginine methyltransferase | PRMT5                  | J556-42R      | 1                                  | Changchun Discovery Sciences |           |                                  |
| Arginine methyltransferase | PRMT5                  | J556-63R      | 1                                  | Changchun Discovery Sciences |           |                                  |
| Arginine methyltransferase | PRMT5                  | J556-70R      | 1                                  | Changchun Discovery Sciences |           |                                  |
| Arginine methyltransferase | Type I PRMTs           | MS023         | 1                                  | Sigma                        | 26598975  |                                  |
| Bromodomains               | ATAD2                  | GSK814        | 10                                 | GSK                          |           |                                  |
| Bromodomains               | ATAD2                  | GSK815        | 10                                 | GSK                          |           | inactive control for GSK814      |
| Bromodomains               | BAZ2A, BAZ2B           | BAZ2-ICR      | 1                                  | Sigma                        | 25719566  |                                  |
| Bromodomains               | BAZ2A, BAZ2B           | GSK2801       | 1                                  | SGC                          | 25799074  |                                  |
| Bromodomains               | BRD1, TAF1             | BAY-299       | 1                                  | SGC                          |           |                                  |
| Bromodomains               | BRD2, BRD3, BRD4, BRDT | (-)-JQ1       | 1                                  | Sigma                        | 20871596  | inactive control for (+)-JQ1     |
| Bromodomains               | BRD2, BRD3, BRD4, BRDT | (+)-JQ1       | 1                                  | Sigma                        | 20871596  |                                  |
| Bromodomains               | BRD2, BRD3, BRD4, BRDT | I-BET         | 1                                  | Sigma                        | 21068722  |                                  |
| Bromodomains               | BRD2, BRD3, BRD4, BRDT | PFI-1         | 5                                  | Sigma                        | 23576556  |                                  |
| Bromodomains               | BRD2, BRD3, BRD4, BRDT | RVX-208       | 5                                  | Cayman                       | 24248379  |                                  |
| Bromodomains               | BRD9                   | I-BRD9        | 10                                 | Sigma                        | 25856009  |                                  |
| Bromodomains               | BRD9, BRD7             | BI-9564       | 1                                  | Sigma                        | 26914985  |                                  |
| Bromodomains               | BRD9, BRD7             | LP99          | 1                                  | Sigma                        | 25864491  |                                  |
| Bromodomains               | BRPF (pan)             | NI-57         | 1                                  | Sigma                        |           |                                  |
| Bromodomains               | BRPF (pan)             | OF-1          | 5                                  | Sigma                        |           |                                  |
| Bromodomains               | BRPF1                  | GSK959        | 1                                  | GSK                          |           |                                  |
| Bromodomains               | BRPF1B                 | PFI-4         | 1                                  | Sigma                        |           |                                  |
| Bromodomains               | CECR2                  | NVS-CECR2-1   | 1                                  | Cayman                       |           |                                  |
| Bromodomains               | CECR2                  | NVS-CECR2-C   | 1                                  | Cayman                       |           | inactive control for NVS-CECR2-1 |

|                           |                             |                    |      |                      |          |                              |
|---------------------------|-----------------------------|--------------------|------|----------------------|----------|------------------------------|
| Bromodomains              | CREBBP, BRD4                | BDOIA000383        | 5    | SGC                  | 24946055 |                              |
| Bromodomains              | CREBBP, EP300               | I-CBP112           | 1    | Sigma                | 26552700 |                              |
| Bromodomains              | CREBBP, EP300               | SGC-CBP30          | 1    | Sigma                | 26261308 |                              |
| Bromodomains              | pan-Bromodomain             | Bromosporine       | 1    | Sigma                | 27757418 |                              |
| Bromodomains              | SMARCA2, SMARCA4, PBRM1     | PFI-3              | 1    | Sigma                | 26702435 |                              |
| Bromodomains              | SMARCA2, SMARCA4, PBRM1     | BDF00008718        | 2.5  | SGC                  |          |                              |
| Bromodomains              | SMARCA2, SMARCA4, PBRM1     | BDF00021522        |      | SGC                  |          |                              |
| Bromodomains              | TRIM24, BRPF                | BDOCA000405a       | 10   | SGC                  | 25974391 |                              |
| Other – Chromodomain      | CBX4, CBX7                  | UNC3866            | 30   | UNC                  | 26807715 |                              |
| Other – Chromodomain      | CBX4, CBX8                  | UNC4219            | 30   | UNC                  | 26807715 | inactive control for UNC3866 |
| Other – Dehydrogenase     | IDH1 R132C/R132H/R132G      | GSK864             | 5    | Sigma                | 26436839 |                              |
| DNA methyltransferase     | DNMT1, DNMT3                | 5-Azacytidine      | 10   | Sigma                | 18425818 |                              |
| DNA methyltransferase     | DNMT1, DNMT3                | 5-Azadeoxycytidine | 5    | Sigma                | 18425818 |                              |
| Histone acetyltransferase | p300/CREBBP                 | C646               | 1    | Sigma                | 21518915 |                              |
| Histone deacetylase       | Class I                     | CI-994             | 1    | Selleckchem          | 15839304 |                              |
| Histone deacetylase       | Class I                     | Romidepsin         | 1    | Selleckchem          | 12208741 |                              |
| Histone deacetylase       | Class I & II                | Valproic acid      | 1000 | Sigma                | 11742974 |                              |
| Histone deacetylase       | Class I, II & IV            | Belinostat         | 5    | Selleckchem          | 12939461 |                              |
| Histone deacetylase       | Class I, II & IV            | SAHA               | 2.5  | Cambridge Bioscience | 11016644 |                              |
| Histone deacetylase       | Class I, II & IV            | Trichostatin A     | 0.5  | Sigma                | 11309348 |                              |
| Histone deacetylase       | Class I, IIB                | PCI-24781          | 10   | Selleckchem          | 16731764 |                              |
| Histone deacetylase       | HDAC1, HDAC3                | Entinostat         | 0.5  | Selleckchem          | 10200307 |                              |
| Histone deacetylase       | HDAC1, HDAC2, HDAC3, HDAC11 | Mocetinostat       | 10   | Selleckchem          | 18413790 |                              |
| Histone deacetylase       | HDAC2                       | Santacruzamate     | 50   | Selleckchem          | 24164245 |                              |
| Histone deacetylase       | HDAC3                       | RGFP966            | 10   | Selleckchem          | 23894374 |                              |
| Histone deacetylase       | HDAC6                       | Rocilinostat       | 10   | Selleckchem          | 22262760 |                              |
| Histone deacetylase       | HDAC6                       | Tubastatin A HCl   | 10   | Selleckchem          | 20614936 |                              |
| Histone deacetylase       | HDAC8                       | PCI-34051          | 5    | Selleckchem          | 18256683 |                              |
| Histone deacetylase       | SIRT1                       | EX 527             | 1    | Selleckchem          | 16354677 |                              |
| Histone deacetylase       | SIRT1                       | SRT1720            | 1    | Selleckchem          | 18046409 | activator                    |
| Histone methyltransferase | DOT1L                       | SGC0946            | 7.5  | Sigma                | 23250418 |                              |
| Histone methyltransferase | EZH2                        | GSK343             | 3    | Sigma                | 24900432 |                              |
| Histone methyltransferase | EZH2                        | UNC1999            | 1    | Sigma                | 23614352 |                              |
| Histone methyltransferase | EZH2                        | UNC2400            | 1    | Sigma                | 23614352 | inactive control for UNC1999 |
| Histone methyltransferase | EZH2, EZH1                  | CPI-169            | 10   | Selleckchem          | 25457180 |                              |
| Histone methyltransferase | EZH2, EZH1                  | CPI-360            | 10   | Selleckchem          | 24183969 |                              |
| Histone methyltransferase | G9a, GLP                    | A-366              | 2    | Sigma                | 24900801 |                              |
| Histone methyltransferase | G9a, GLP                    | UNC0638            | 1    | Sigma                | 21743462 |                              |
| Histone methyltransferase | G9a, GLP                    | UNC0642            | 1    | Sigma                | 24102134 |                              |
| Histone methyltransferase | SETD7                       | PFI-2              | 2    | Sigma                | 25136132 |                              |
| Histone                   | SMYD2                       | BAY-598            | 1    | Sigma                | 27075367 |                              |

|                                    |                     |                    |      |                     |          |                                  |
|------------------------------------|---------------------|--------------------|------|---------------------|----------|----------------------------------|
| methyltransferase                  |                     |                    |      |                     |          |                                  |
| Histone methyltransferase          | SMYD2               | LLY-507            | 1    | Sigma               | 25825497 |                                  |
| Histone methyltransferase          | SUV39H1             | Chaetocin          | 0.05 | Sigma               | 16408017 |                                  |
| Histone methyltransferase          | SUV420H1, SUV420H2  | A-196              | 1    | Sigma               |          |                                  |
| Other - Kinase inhibitor           | Haspin              | 5-Iodotubercidin   | 1    | Selleckchem         | 23071153 |                                  |
| Other - Kinase inhibitor           | Haspin              | CHR-6494           | 1    | Sigma               | 21804608 |                                  |
| Other - Kinase inhibitor           | Haspin              | SGI-1776           | 10   | Selleckchem         | 19734450 |                                  |
| Other - Kinase inhibitor           | PIM                 | K00135             | 1    | SGC                 | 17638903 |                                  |
| Lysine demethylases                | JmjC (pan)          | (E)-JIB-04         | 0.05 |                     | 23792809 |                                  |
| Lysine demethylases                | JmjC (pan)          | Methylstat (Ester) | 2.5  |                     | 21585201 |                                  |
| Lysine demethylases                | KDM4                | ML324              | 5    | (NIH/NCATS)         | 24260783 |                                  |
| Lysine demethylases                | KDM5                | KDM5-C70           | 10   | Xcess Biosciences   | 27214403 |                                  |
| Lysine demethylases                | KDM5                | KDOAM000025        | 1    | SGC                 |          |                                  |
| Lysine demethylases                | KDM5                | KDOAM000032        | 1    | SGC                 |          | inactive control for KDOAM000025 |
| Lysine demethylases                | KDM5                | KDOPZ000032        | 1    | SGC                 |          |                                  |
| Lysine demethylases                | KDM5B, KDM6A, KDM6B | GSK-J4             | 10   | Tocris              | 22842901 |                                  |
| Lysine demethylases                | KDM5B, KDM6A, KDM6B | GSK-J5             | 10   | Tocris              | 22842901 | inactive control for GSK-J4      |
| Lysine demethylases                | KDM5B, KDM6A, KDM6B | KDOBA000067        | 10   | SGC                 |          |                                  |
| Lysine demethylases                | LSD1                | GSK690             | 5    |                     | 24912735 |                                  |
| Lysine demethylases                | LSD1                | GSK-LSD1           | 0.5  | Sigma               |          |                                  |
| Lysine demethylases                | LSD1                | Tranylcypromine    | 20   | Sigma               | 16793513 |                                  |
| Lysine demethylases                | pan-2-OG            | IOX1               | 40   | Sigma               | 21124847 |                                  |
| Other- Methyl Lysine Binder        | EED                 | A-395              | 1    | SGC                 |          |                                  |
| Other- Methyl Lysine Binder        | EED                 | A-395N             | 1    | SGC                 |          | inactive control for A-395       |
| Other- Methyl Lysine Binder        | L3MBTL3             | UNC1215            | 5    | Sigma               | 23292653 |                                  |
| Other- Methyl Lysine Binder        | WDR5                | OICR-9429          | 1    | SGC                 | 26167872 |                                  |
| Other- Peptidyl arginine deiminase | PAD4                | GSK106             | 1    | Sigma               | 25622091 | inactive control for GSK484      |
| Other- Peptidyl arginine deiminase | PAD4                | GSK484             | 1    | Sigma               | 25622091 |                                  |
| Other- Poly ADP ribose polymerase  | PARP1               | Rucaparib          | 10   | Strattec Scientific | 17363489 |                                  |
| Other- Poly ADP ribose polymerase  | PARP1, PARP2        | Olaparib           | 1    | Selleckchem         | 18800822 |                                  |
| Other- Prolyl-Hydroxylases         | PHD2                | IOX2               | 10   | SGC                 | 23683440 |                                  |

**Supplementary Table 2:** Clinical details of RA patients providing samples to this study.

(A) Clinical details of rheumatoid arthritis (RA) patients providing blood samples used in this study. All samples were taken on the day of diagnosis and patients were drug naïve. Abbreviations: anti-CCP: anti-cyclic citrullinated peptides; RF: rheumatoid factor; DAS28: Disease activity score 28; n.a. = not available

| Sex    | Age | Anti-CCP | RF | DAS28 | Smoker |
|--------|-----|----------|----|-------|--------|
| Female | 60  | +        | +  | 5.16  | No     |
| Female | 48  | +        | -  | 5.94  | Prev   |
| Male   | 43  | +        | +  | 4.27  | No     |
| Female | 72  | +        | +  | 4.45  | No     |
| Female | 28  | +        | +  | 5.00  | No     |
| Female | 44  | +        | +  | 4.60  | No     |
| Female | 50  | +        | +  | 5.13  | Prev   |
| Female | 60  | n.a.     | +  | 7.50  | No     |

(B) Details for RA patients providing RA synovial tissue. Patients were previously diagnosed and treated. Abbreviations: MTX: methotrexate; n.a. = not available

| Sex    | Age | Treatment          | RF   |
|--------|-----|--------------------|------|
| Female | 65  | MTX                | +    |
| Female | 72  | MTX                | n.a. |
| Female | 56  | MTX                | n.a. |
| Female | 75  | MTX                | n.a. |
| Female | 79  | MTX                | n.a. |
| Female | 72  | MTX, sulfasalazine | n.a. |



**Supplementary Table 3:** Sequences of RT-PCR primer pairs for genes used in this study

| Gene   | Forward primer          | Reverse primer          |
|--------|-------------------------|-------------------------|
| IFNG   | TCGGTAACTGACTTGAATGTCCA | TCGCTTCCCTGTTTTAGCTGC   |
| TNF    | GAGGCCAAGCCCTGGTATG     | CGGGCCGATTGATCTCAGC     |
| LTA    | CATCTACTTCGTCTACTCCCAGG | CCCCGTGGTACATCGAGTG     |
| LTB    | GGAGACGACGAAGGAACAGG    | GTAGAGGTAATAGAGGCCGTCC  |
| CXCL10 | GTGGCATTCAAGGAGTACCTC   | TGATGGCCTTCGATTCTGGATT  |
| CXCL11 | GACGCTGTCTTTGCATAGGC    | GGATTTAGGCATCGTTGTCCTTT |
| GZMA   | ATTCTTGGGGCTCACTCAATAAC | GGGTCATAGCATGGATAGGGAAA |
| GZMH   | CTGGCTGGGGTTATGTCTCAA   | GGCTACGTCCTTACACACGAG   |
| NCR1   | TGGACCCGAAGTGATCTCG     | TCCTTGAGCAGTAAGAACATGC  |
| NCR2   | GGCTCTCAGGCACAATCCAAG   | GCTGAAGCCTCCTTACACCA    |
| NCR3   | CCCCTGAGATTCGTACCCTG    | CTCCACTCTGCACACGTAGAT   |
| MT1A   | GTGCGCCTTATAGCCTCTCA    | AGGAGCAGCAGCTCTTCTTG    |
| MT1B   | TCCTGCAAGAAGTGCTGCTG    | GCAAACCGGTCAGGGTAGTT    |
| MT1E   | CGCCACTGGTGGCTCC        | AAGAGCTGTTCCACATCAGG    |
| MT1G   | TCCTGCAAGAAGAGCTGCTG    | TTTGTACTTGGGAGCAGGGC    |
| MT1H   | CCCTCCACGTGTTCCACTG     | AGGAGCAGCAGCTCTTCTTG    |
| MT1X   | ACCTCCTGCAAGAAGAGCTG    | TAGCAAACGGGTCAGGGTTG    |
| MT4    | CACTGGAGCCTTTCGGACAC    | TGCAGATTCCTCCAGACATGC   |
| MT2A   | TCCTCCAAGTCCCAGCGAAC    | GAGCAGCAGCTTTTCTTGCAG   |
